# Supplementary material for: The role of nitrogen and iron biogeochemical cycles in the production and export of dissolved organic matter in agricultural headwater catchments
Source: Copernicus journal article supplement (doi:10.5194/bg-21-4533-2024), 2024-10-21

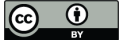

*Supplement of*

## **The role of nitrogen and iron biogeochemical cycles in the production and export of dissolved organic matter in agricultural headwater catchments**

**Thibault Lambert et al.**

*Correspondence to:* Thibault Lambert (tibo.lambert@gmail.com)

The copyright of individual parts of the supplement might differ from the article licence.

**Figure S1** – Long-term trends in dissolved organic carbon (DOC) concentrations measured in streams in Brittany over the 2007-2020 period based on public data. Trends were determined based on Mann-Kendall tests with a  $p$ -value of 0.05. Over 76 streams, 11 showed a positive increasing trend, 2 a negative trend, and the rest no significant evolution.

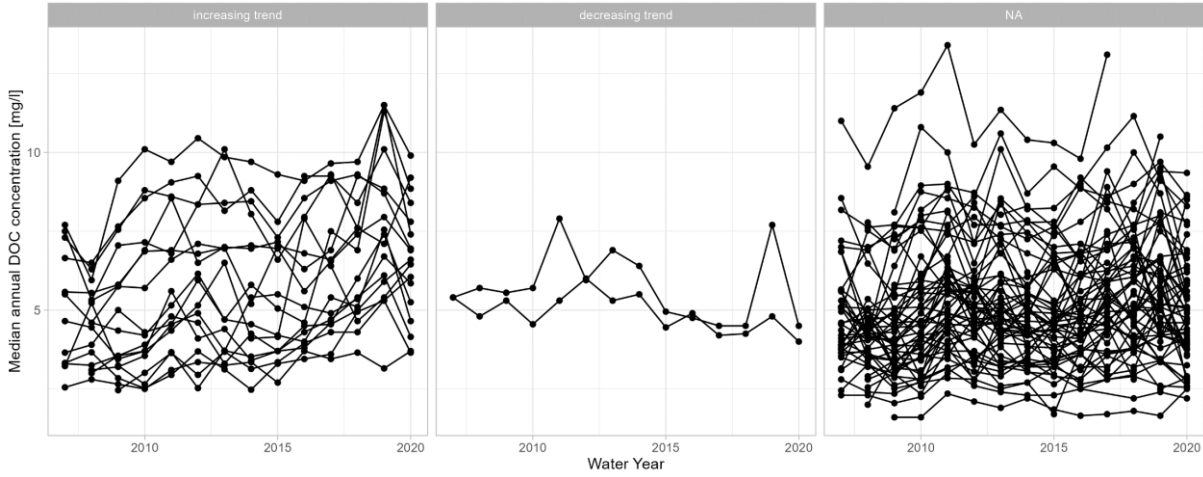

**Figure S2** – Details on lysimeters (from Dupas et al., 2015).

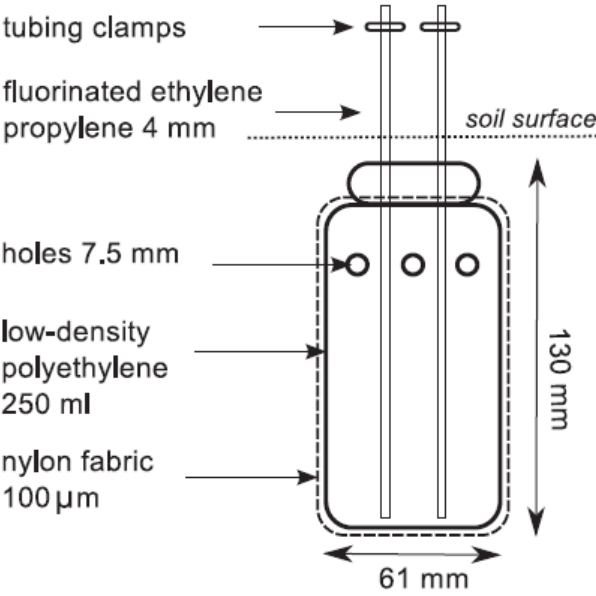

**Figure S3** – A) Loadings of PARAFAC components identified in this study and B) results from the split half analysis.

A)

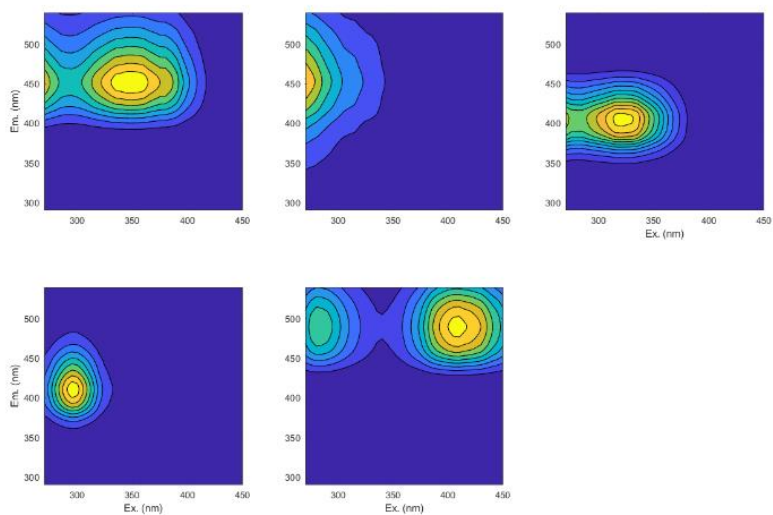

B)

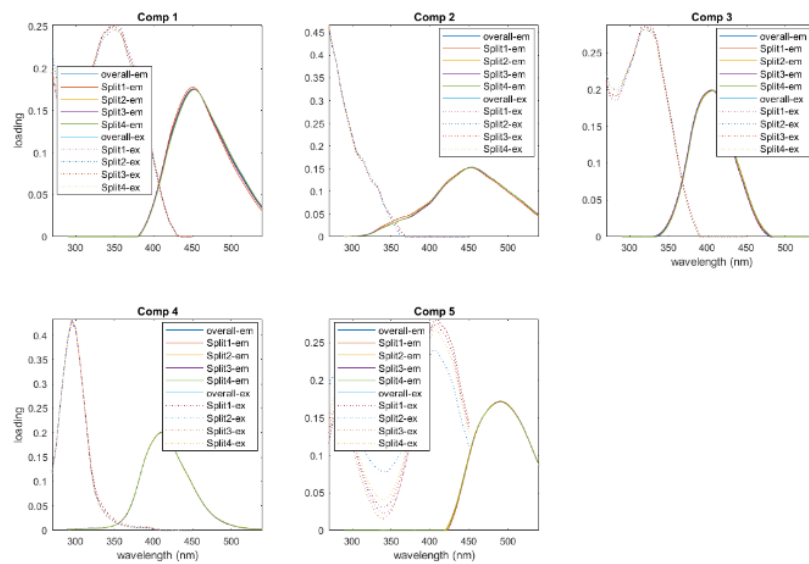

**Figure S4** – Correlation coefficients of the different variables with the five first dimension of the PCA.

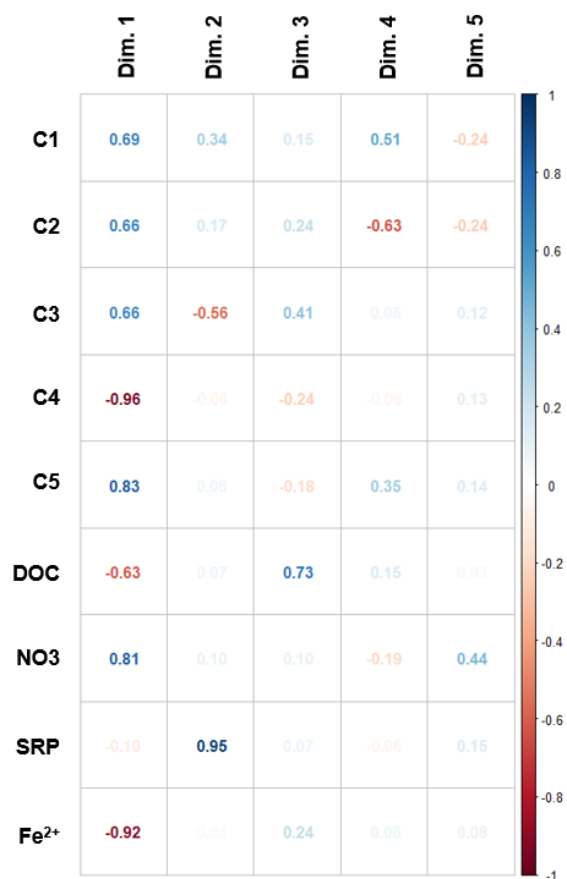

**Figure S5** – Correlation between pH and DOC concentrations for all lysimeters and all dates.

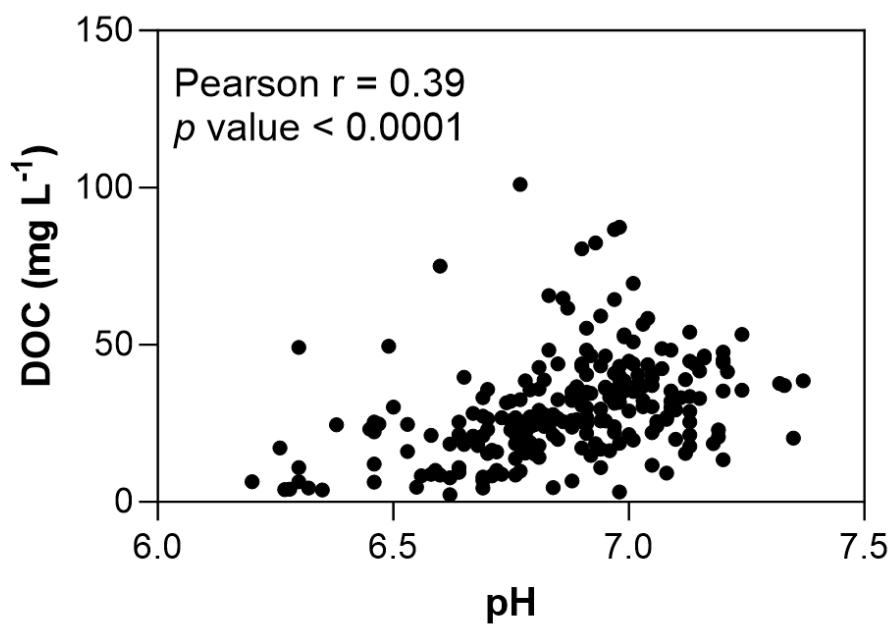

Supplement: Supplementary file 1 [file bg-21-4533-2024-supplement.pdf]
